# Supplementary material for: Comparison of bleeding risks among non-vitamin K antagonist oral anticoagulants using the Korea adverse event reporting system database
Source: PubMed Central journal article supplement — Ther Adv Drug Saf. 2019 Sep 24;10:2042098619876737. doi: 10.1177/2042098619876737 (PMC6759695; doi:10.1177/2042098619876737), 2019-09-24
Supplement: NOAC_signal_evaluation_tables_S1_180807.pdf [file NOAC_signal_evaluation_tables_S1_180807.pdf]

**Supplement table 1. List of WHO-ART PT codes associated with bleeding**

| PT Code | Diagnosis                                 | PT Code | Diagnosis                        |
|---------|-------------------------------------------|---------|----------------------------------|
| 70      | haemarthrosis                             | 926     | haemorrhage anterior chamber eye |
| 252     | retinal haemorrhage                       | 930     | gingival bleeding                |
| 276 †   | duodenal ulcer haemorrhagic               | 1004    | ocular haemorrhage               |
| 288 †   | gastric ulcer haemorrhagic                | 1014 †  | haemorrhage rectum               |
| 289 †   | gastric ulcer haemorrhagic perforated     | 1068 †  | haemorrhage intracranial         |
| 292 †   | gastritis haemorrhagic                    | 1085 †  | hepatic haemorrhage              |
| 294 †   | GI haemorrhage                            | 1135    | haemorrhage in pregnancy         |
| 297 †   | haematemesis                              | 1143    | hemopericardium                  |
| 306 †   | melaena                                   | 1180    | colitis haemorrhagic             |
| 312 †   | oesophageal ulceration haemorrhagic       | 1193    | muscle haemorrhage               |
| 313     | oral haemorrhage                          | 1205    | dermatitis haemorrhagic          |
| 316 †   | peptic ulcer haemorrhagic                 | 1211    | conjunctival haemorrhage         |
| 317 †   | peptic ulcer haemorrhagic perforated      | 1214 †  | haemorrhage retroperitoneal      |
| 444 †   | cerebral haemorrhage                      | 1348    | purpura thrombocytopenic         |
| 452     | haemorrhage NOS                           | 1353    | haematoma                        |
| 459     | purpura                                   | 1419 †  | haemorrhage intraabdominal       |
| 462     | rash purpuric                             | 1499    | post-menopausal bleeding         |
| 463 †   | subarachnoid haemorrhage                  | 1553    | splinter haemorrhages            |
| 515     | epistaxis                                 | 1570 †  | haemorrhage cerebellar           |
| 516     | haemoptysis                               | 1571 †  | haemorrhage brain stem           |
| 534     | pulmonary haemorrhage                     | 1744    | penile haemorrhage               |
| 538     | respiratory tract haemorrhage             | 1747    | post-operative haemorrhage       |
| 588 †   | haemoperitoneum                           | 1752    | injection site bleeding          |
| 600     | cystitis haemorrhagic                     | 1757    | vitreous haemorrhage             |
| 604     | haematuria                                | 1989 †  | haemorrhage stroke               |
| 651     | intermenstrual bleeding                   | 2033    | application site bleeding        |
| 656     | menorrhagia                               | 2049    | coronary atheroma haemorrhage    |
| 658     | withdrawal bleeding                       | 2134 †  | haemorrhage foetal               |
| 666     | uterine haemorrhage                       | 2151    | anaemia haemorrhagic             |
| 668     | vaginal haemorrhage                       | 2152 †  | haemorrhage brain                |
| 759 †   | adrenal haemorrhage                       | 2194 †  | ascites haemorrhagic             |
| 763 †   | duodenal ulcer haemorrhagic<br>perforated |         |                                  |

\* WHO-ART PT, WHO adverse reaction terminology Preferred Terms; GI, gastrointestinal; NOS, not otherwise specified

†, defined as major bleeding
